# Supplementary material
Source: PubMed Central journal article supplement (PMC5464376)
Supplement: now175_suppl_Suppl_Figure_4_final.pdf [file now175_suppl_Suppl_Figure_4_final.pdf]

■ Downregulated 
 ■ No change 
 ■ Upregulated 
 ■ No overlap with dataset 
 ■  $-\log(p\text{-value})$

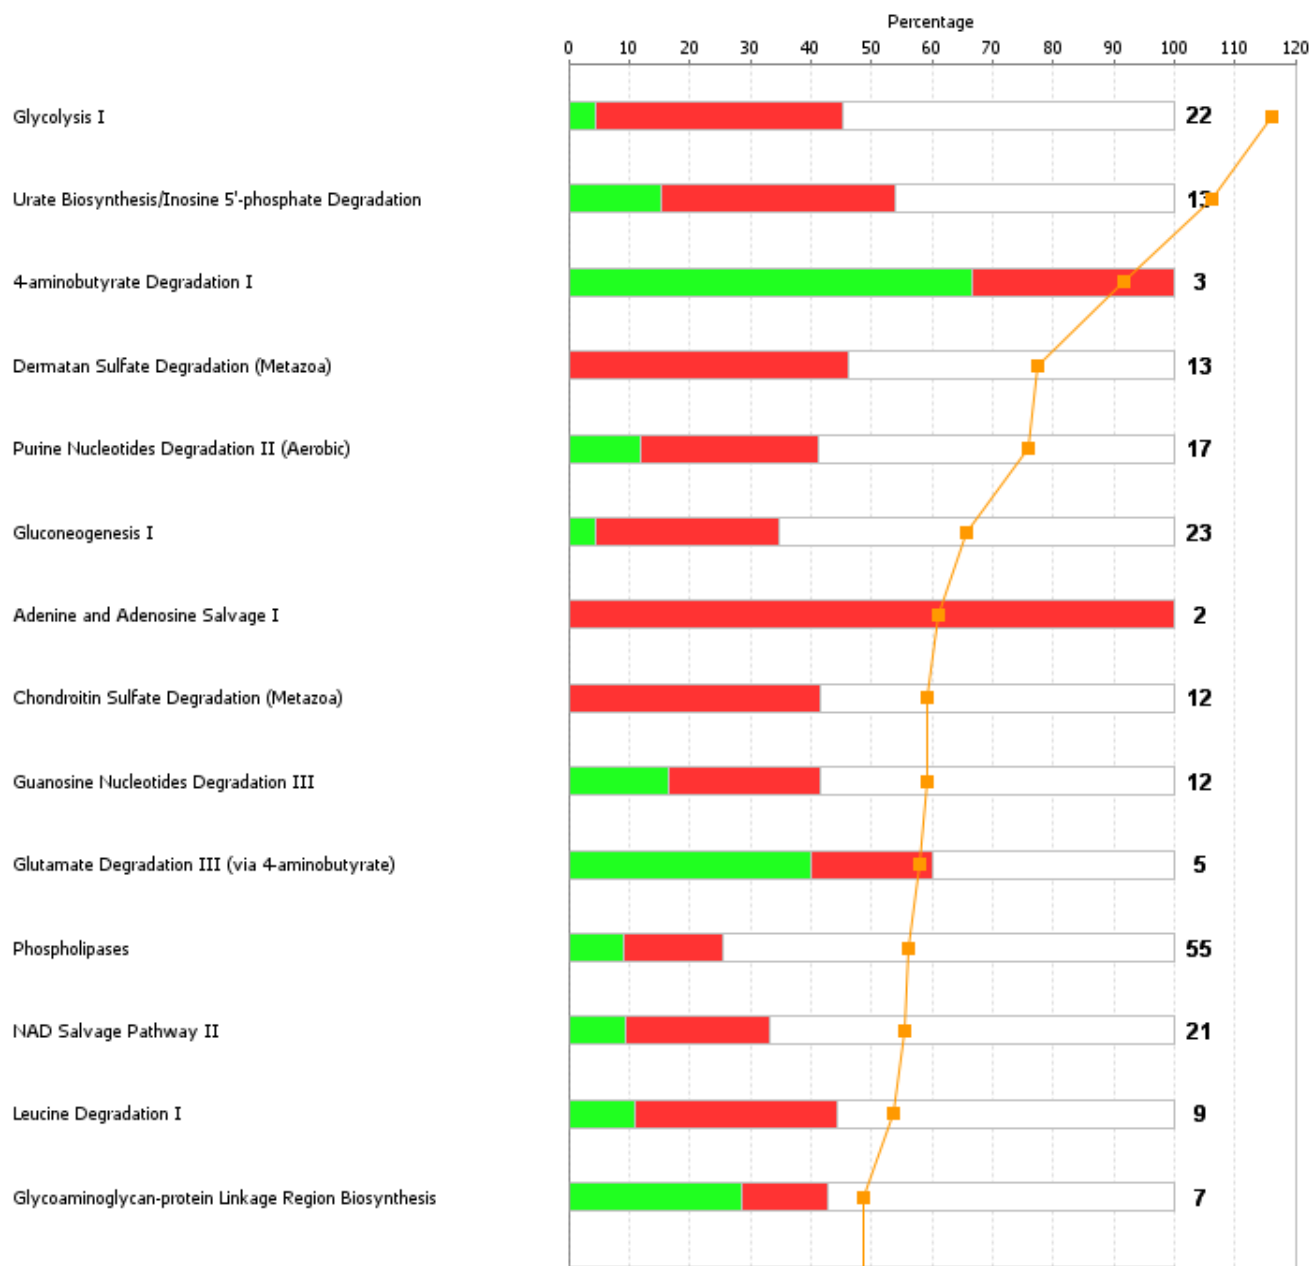

Supplementary Figure 4
