# Supplementary material
Source: PubMed Central journal article supplement (PMC5464376)

Complex I  
non-hypoxic

Porin  
non-hypoxic

Complex I  
hypoxic

Porin  
hypoxic

Patient 1

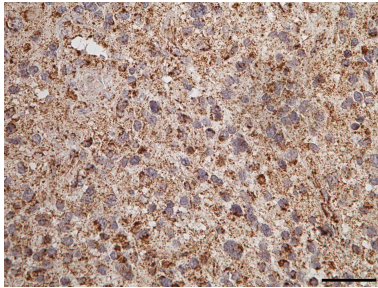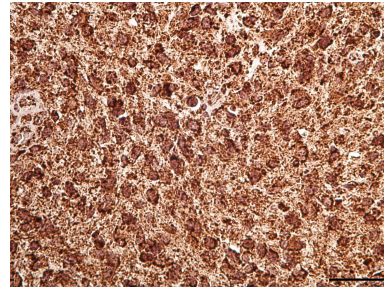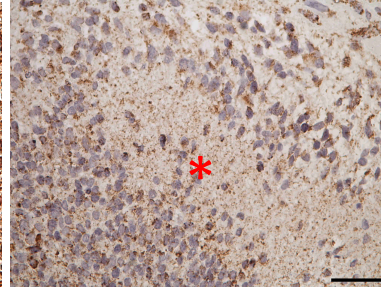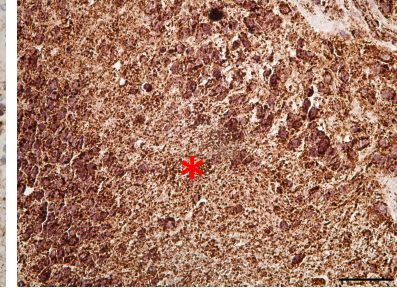

Patient 2

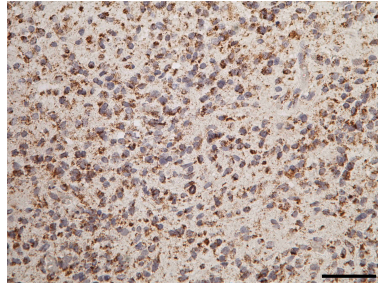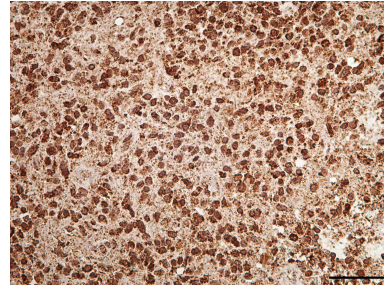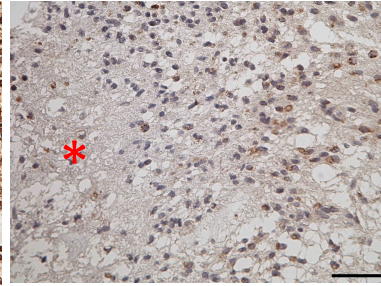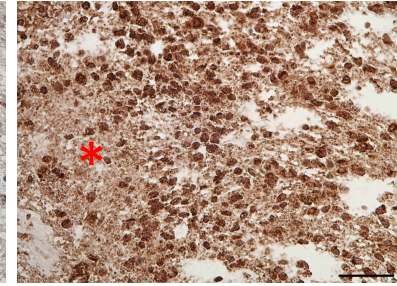

Patient 3

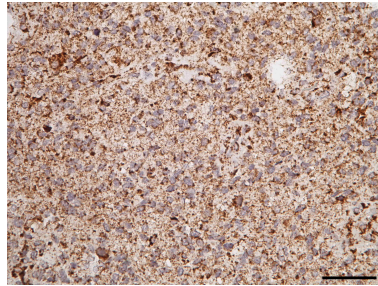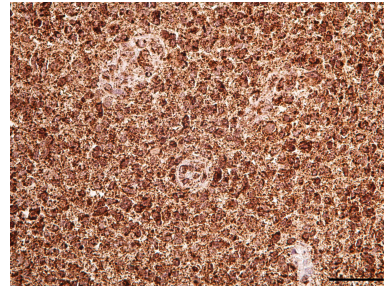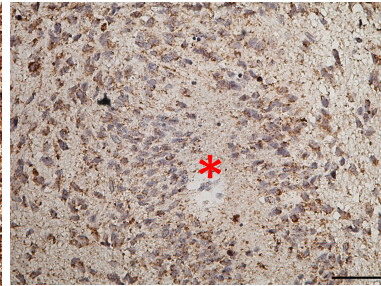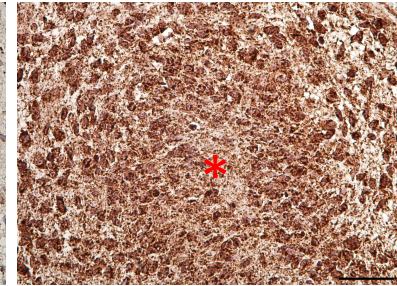

Supplement: now175_suppl_Supplementary_Figure_5_final.pdf [file now175_suppl_Supplementary_Figure_5_final.pdf]
