# Supplementary material
Source: PubMed Central journal article supplement (PMC5464376)

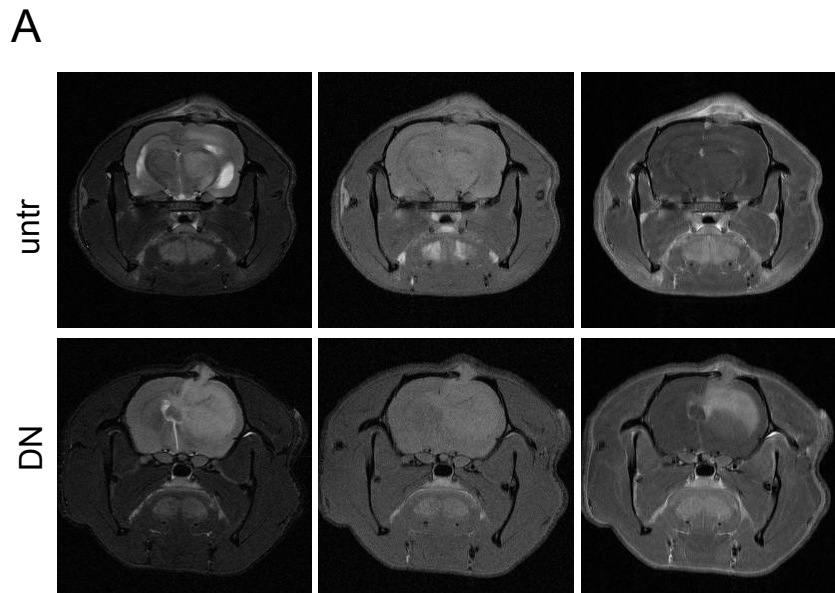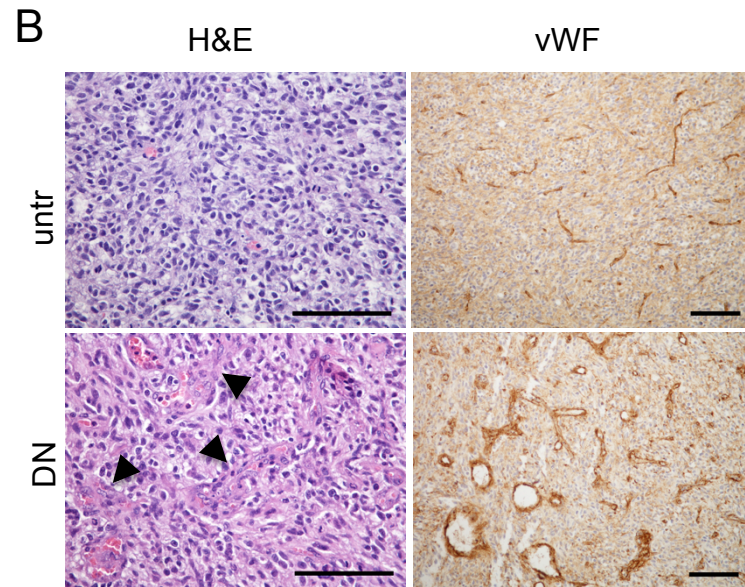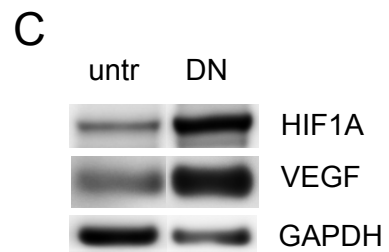

Supplement: now175_suppl_Suppl._Figure_1_final.pdf [file now175_suppl_Suppl._Figure_1_final.pdf]

untr

DN

ASCL1

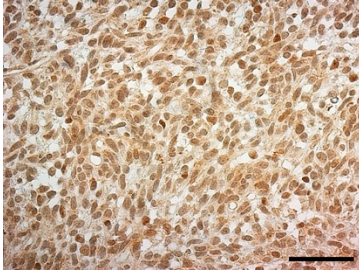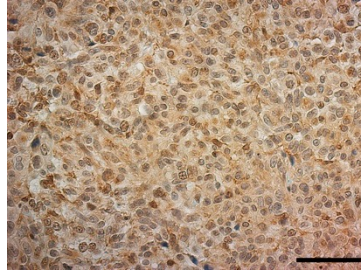

Olig2

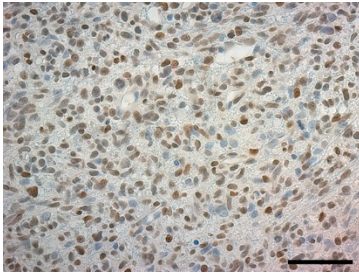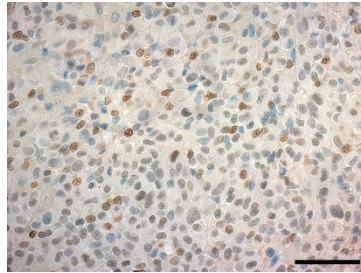

BHLHB2

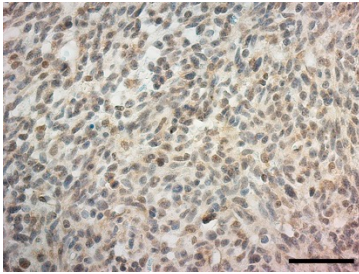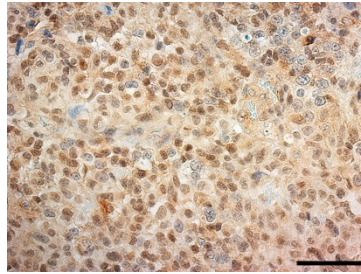

CEBPB

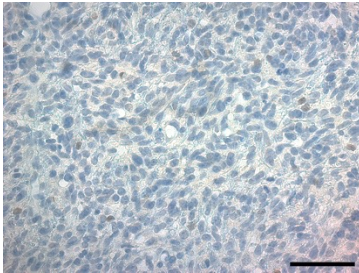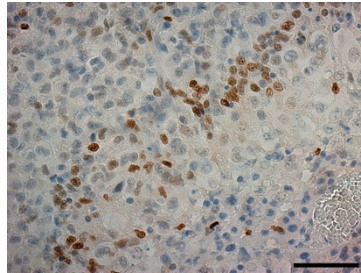

pStat3

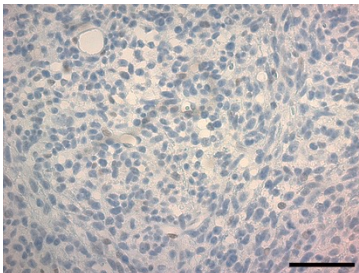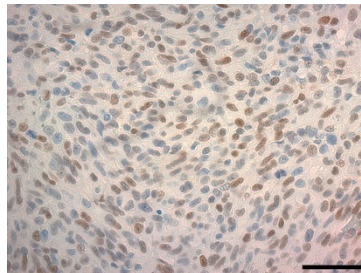

CD44

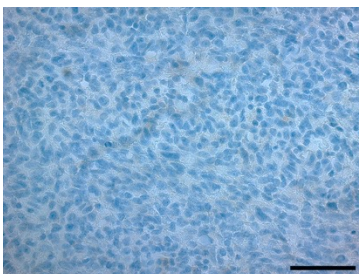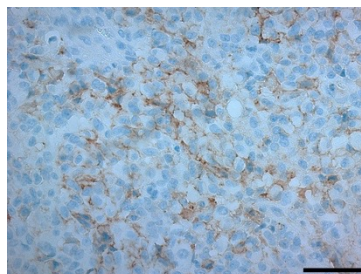

Supplement: now175_suppl_Suppl._Figure_2_new.pdf [file now175_suppl_Suppl._Figure_2_new.pdf]

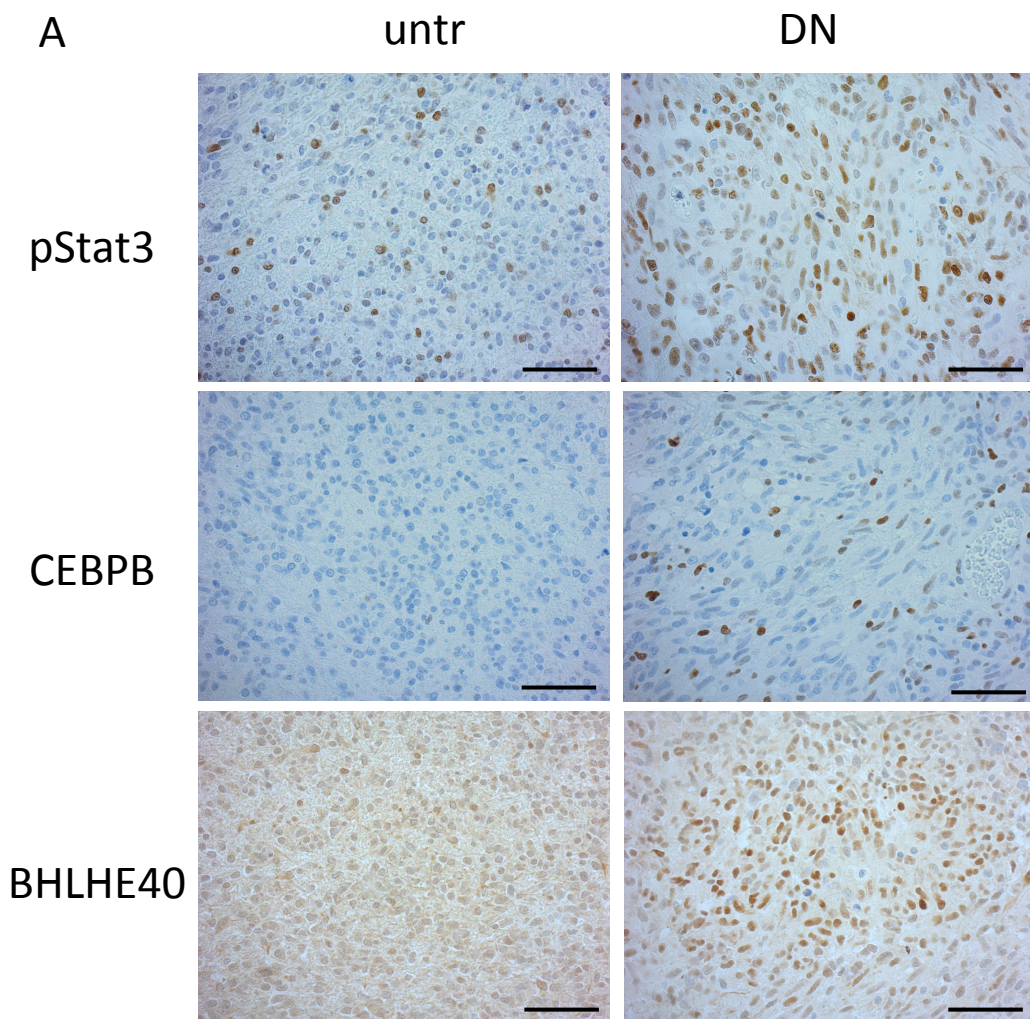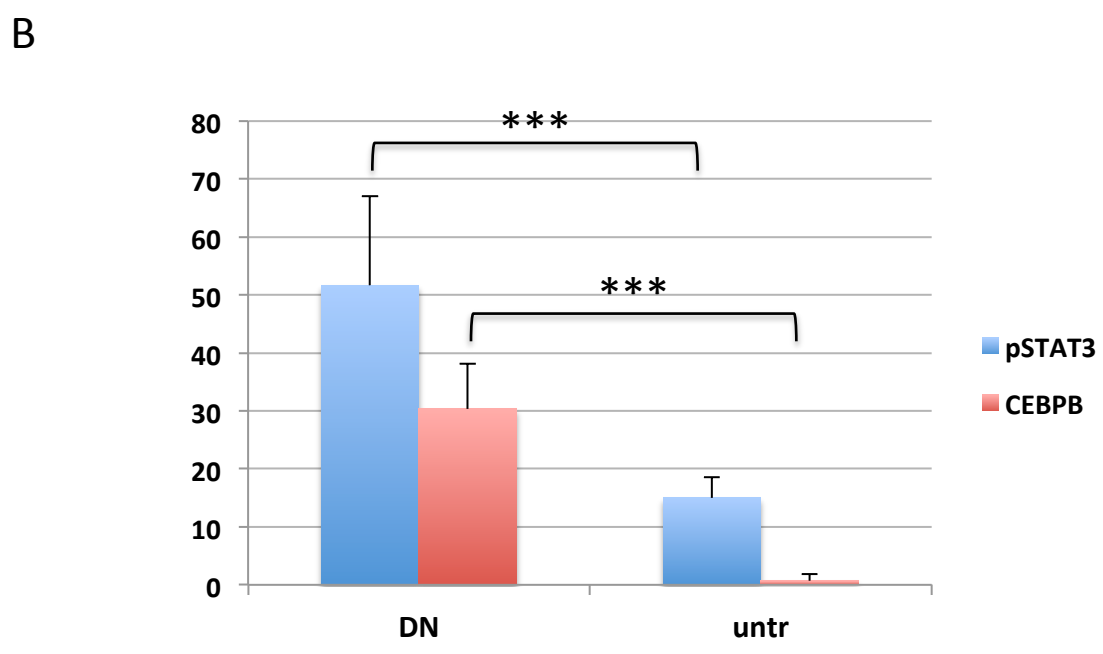

Supplement: now175_suppl_SupplFigure3_new.pdf [file now175_suppl_SupplFigure3_new.pdf]
